# Supplementary material
Source: PubMed Central journal article supplement (PMC3650527)
Supplement: JB.00024-13_zjb999092532so1.pdf [file JB.00024-13_zjb999092532so1.pdf]

## Supplemental Materials and Methods

**Mass spectrometry of UTR::*cyaA'* fusions.** Bacteria from overnight LB broth cultures were pelleted, washed with PBS, and flash frozen. Tryptic digests of cell lysates were analyzed at least two times by LC-MS/MS using an Orbitrap mass spectrometer. To determine if peptides matched UTR encoded residues, the *gtgA*, *cigR*, *gogB*, *sseL*, and *steD* UTRs were translated to KARLEP, HQKGNI, NNDSLV, SLYTEE, and VHEEVY, respectively. These motifs were appended to the CyaA' sequence and used as a reference for spectrum-to-peptide matching with MS-GFDB (1).

CyaA' Sequence:

```
MQGQQSHQAGYANAADRESGIPAAVLDGIKAVAKEKNATLMFRLVNPSTSLIAEGVATKGLGV  
HAKSSDWGLQAGYIPVNPNSKLFGRAPVIARADNDVNSSLAHGHTAVDLTSLKERLDYLRQA  
GLVTGMADGVVASNHAGYEQFEFRVKETSDGRYAVQYRRKGGDDFEAVKVIIGNAAGIPLTADID  
MFAIMPHLSNFRDSARSSVTSVTDYLRTRRAASEATGGLDRERIDLLWKIARAGARSAVG  
TEARRQFRYDGMNIGVITDFELEVNRNALNRRRAHAVAQDQVQVHGTEQNNPFPEADEKIFVVSA  
TGESQMLTRGQLKEYIGQQRGEGYVFYENRAYGVAGKSLFDDGLGAAPGVPSGRSKFSPDVLET  
VPASPLRRPSLGAVERQDSGYDSLGD*
```

Because samples were derived from bacterial lysates, spectra were also searched against the *S. Typhimurium* 14028 proteome as well as a collection of contaminants commonly observed in MS experiments. Strict filters were used for peptide identifications. For peptides observed only once, we used an MS-GF spectral probability of  $1E^{-10}$ , PPM mass error  $< 2$  and  $> -2$ , and a peptide false discovery rate (FDR) of 0. For peptides observed multiple times, we used a minimum MS-GF spectral probability of  $2E^{-10}$ , PPM mass error  $< 3$  and  $> -3$ , and at least one observation with an FDR of 0.

# Supplemental Figure 1

## A

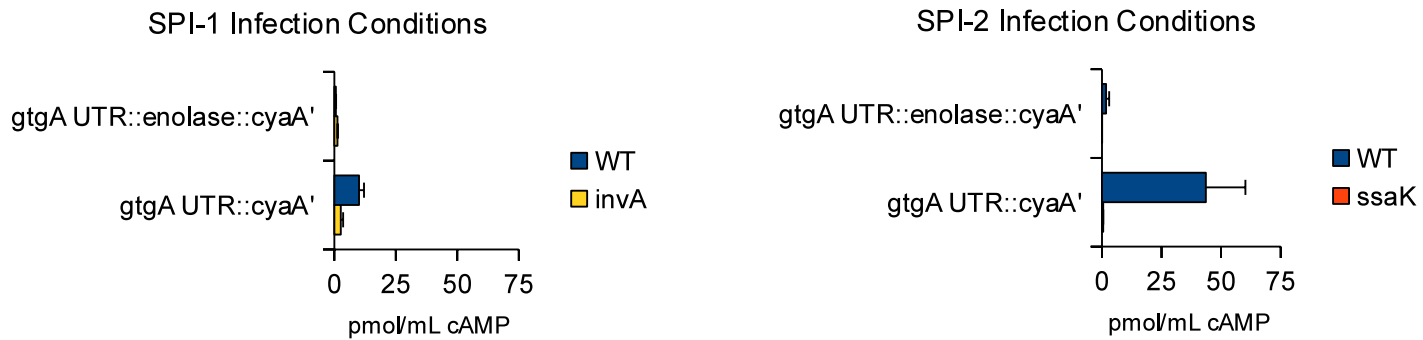

## B

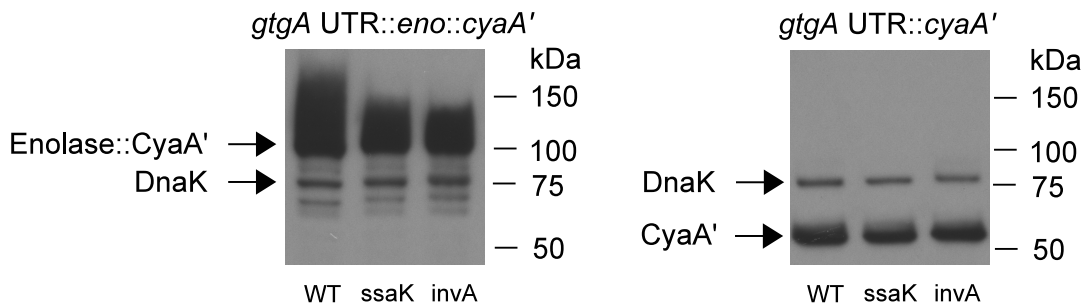

**Supplemental Figure 1. General utility of the *gtgA* UTR as a T3S signal.** (A) Translocation of enolase::CyaA'. The *gtgA* UTR was fused to enolase::cyaA' and tested for secretion into J774 macrophages. For comparison, the *gtgA* UTR::cyaA' fusion was tested in parallel. Bacteria were induced for SPI-1 and SPI-2 expression and used to infect J774 macrophages. Translocation was evaluated by cAMP ELISA. The *invA* and *ssaK* backgrounds are SPI-1 and SPI-2 functional mutants, respectively. (B) Construct expression. Bacteria from LB broth cultures were analyzed by Western blot using antibodies raised against CyaA' and DnaK to evaluate expression and loading, respectively. Approximately  $10^5$  bacteria were loaded per well.

# Supplemental Figure 2

Translocated

Not Translocated

*cigR* UTR::*cyaA*'

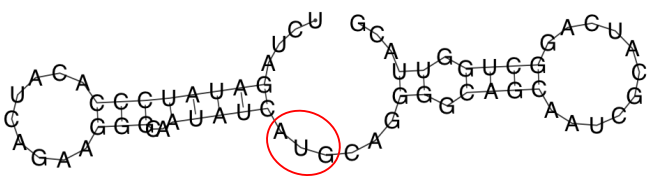

*sifB* UTR::*cyaA*'

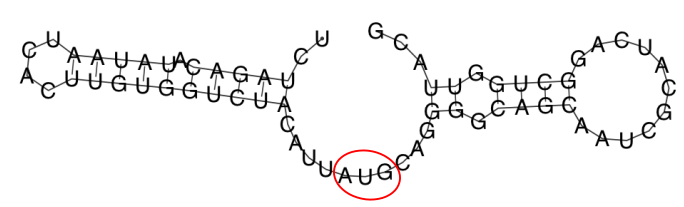

*gtgA* UTR::*cyaA*'

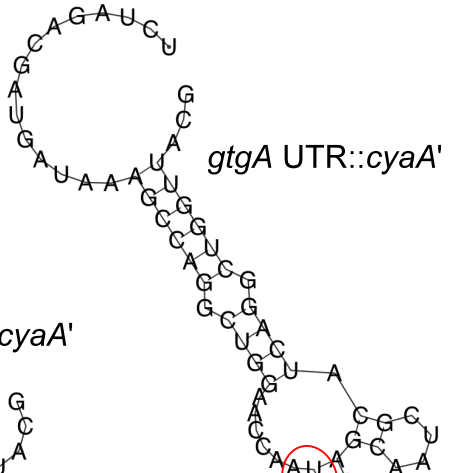

*sspH2* UTR::*cyaA*'

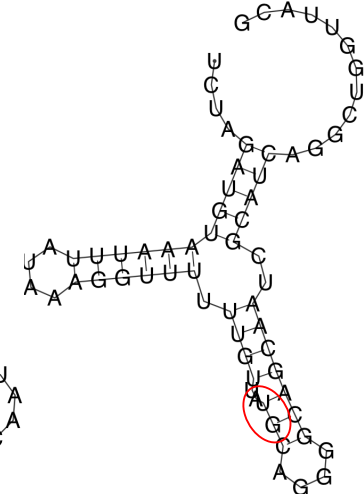

*steD* UTR::*cyaA*'

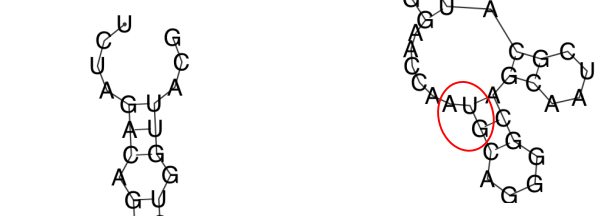

*spvC* UTR::*cyaA*'

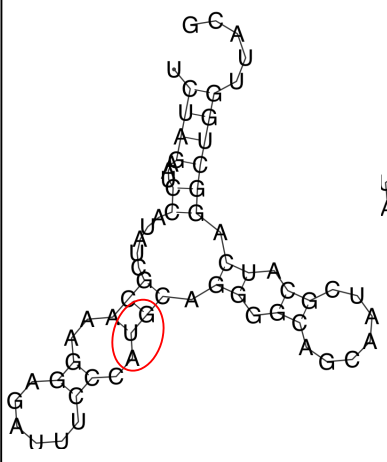

*sseL* UTR::*cyaA*'

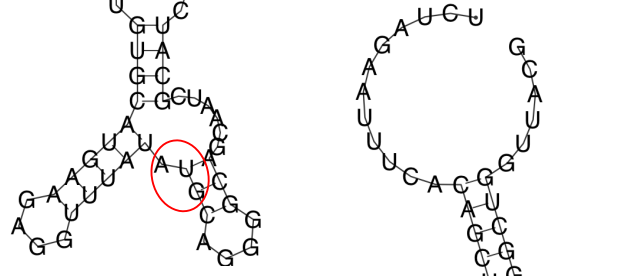

*steA* UTR::*cyaA*'

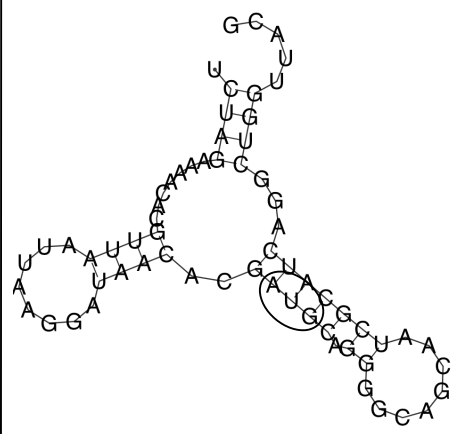

*gogB* UTR::*cyaA*'

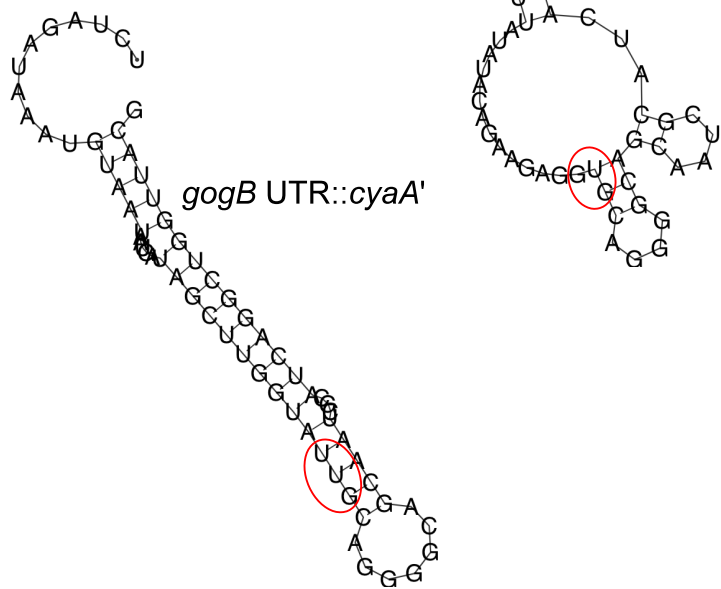

*sseD* UTR::*cyaA*'

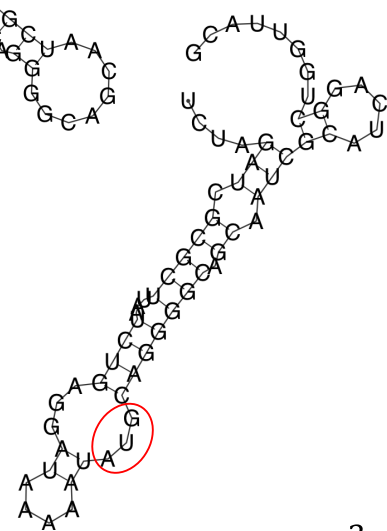

**Supplemental Figure 2. RNAfold structural analysis.** RNAfold structural prediction of UTR::*cyoA*' fusions. Sixty five bp nucleotides were chosen for analysis. Predicted start codons are circled. (Left) Fusions sufficient for translocation. (Right) Fusions insufficient for translocation.

# Supplemental Figure 3

## A

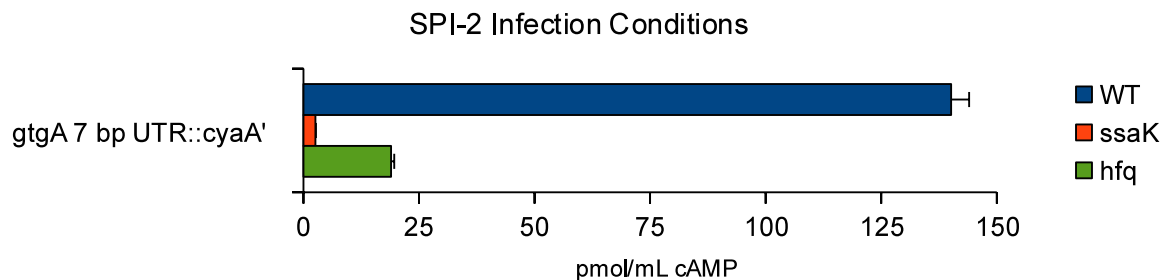

## B

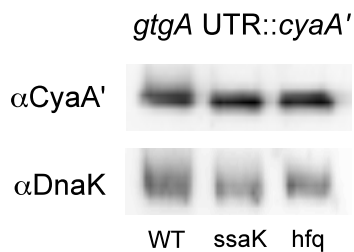

**Supplemental Figure 3. Translocation of the *gtgA* 7 bp UTR by an *hfq* mutant.** (A) Bacteria were induced for SPI-2 expression and used to infect J774 macrophages. Translocation was evaluated by cAMP ELISA. The *ssaK* background is a SPI-2 functional mutant. (B) Construct expression. Bacteria from LB broth cultures were analyzed by Western blot using antibodies raised against CyaA' and DnaK to evaluate expression and loading, respectively. Approximately  $10^5$  bacteria were loaded per well.

# Supplemental Figure 4

## A

### UTR Fusions from Infected Cells

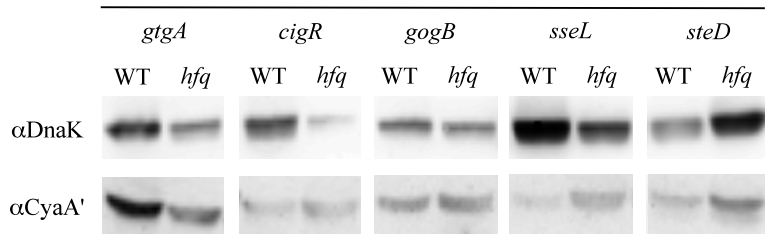

## B

### Full Length Effectors from Infected Cells

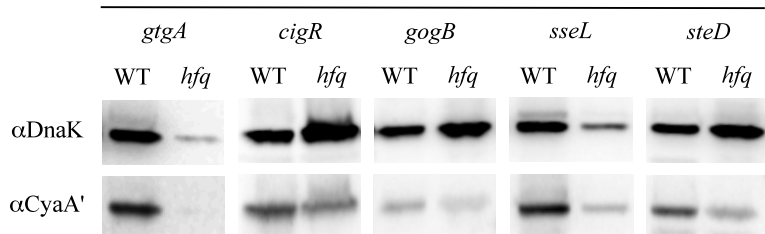

**Supplemental Figure 4. Protein expression from infected cells.** (A) Expression of UTR fusions. J774 cells were infected with wild type and *hfq* mutant bacteria expressing various UTR::CyaA' fusions. Six to eight hours post-infection, lysates were analyzed by Western blot using anti CyaA' and DnaK antibodies. Representative Western blot shown. (B) Expression of intact effectors fused to CyaA'. Experiments performed as described above. Representative Western blots shown.

**Supplemental Table 1. Strains and plasmids used in this study.**

| Category       | Strain/Plasmid                    | Genotype/Description              | Reference/Source |
|----------------|-----------------------------------|-----------------------------------|------------------|
| S. Typhimurium | 14028                             | Wild type                         | ATCC             |
|                | MJW1301                           | 14028 <i>ssaK::cat</i>            | (2)              |
|                | MJW1835                           | 14028 <i>invA::cat</i>            | (2)              |
|                | GSN3001                           | 14028 transformed with pGSN4001   | This study       |
|                | GSN3002                           | MJW1301 transformed with pGSN4001 | This study       |
|                | GSN3003                           | MJW1835 transformed with pGSN4001 | This study       |
|                | GSN3004                           | 14028 transformed with pGSN4002   | This study       |
|                | GSN3005                           | MJW1301 transformed with pGSN4002 | This study       |
|                | GSN3006                           | MJW1835 transformed with pGSN4002 | This study       |
|                | GSN3007                           | 14028 transformed with pGSN4003   | This study       |
|                | GSN3008                           | MJW1301 transformed with pGSN4003 | This study       |
|                | GSN3009                           | MJW1835 transformed with pGSN4003 | This study       |
|                | GSN3010                           | 14028 transformed with pGSN4004   | This study       |
|                | GSN3011                           | MJW1301 transformed with pGSN4004 | This study       |
|                | GSN3012                           | MJW1835 transformed with pGSN4004 | This study       |
|                | GSN3013                           | 14028 transformed with pGSN4005   | This study       |
|                | GSN3014                           | MJW1301 transformed with pGSN4005 | This study       |
|                | GSN3015                           | MJW1835 transformed with pGSN4005 | This study       |
|                | GSN3016                           | 14028 transformed with pGSN4006   | This study       |
|                | GSN3017                           | MJW1301 transformed with pGSN4006 | This study       |
|                | GSN3018                           | MJW1835 transformed with pGSN4006 | This study       |
|                | GSN3019                           | 14028 transformed with pGSN4007   | This study       |
|                | GSN3020                           | MJW1301 transformed with pGSN4007 | This study       |
|                | GSN3021                           | MJW1835 transformed with pGSN4007 | This study       |
|                | GSN3022                           | 14028 transformed with pGSN4008   | This study       |
|                | GSN3023                           | MJW1301 transformed with pGSN4008 | This study       |
|                | GSN3024                           | MJW1835 transformed with pGSN4008 | This study       |
|                | GSN3025                           | 14028 transformed with pGSN4009   | This study       |
|                | GSN3026                           | MJW1301 transformed with pGSN4009 | This study       |
|                | GSN3027                           | MJW1835 transformed with pGSN4009 | This study       |
|                | GSN3028                           | 14028 transformed with pGSN4010   | This study       |
|                | GSN3029                           | MJW1301 transformed with pGSN4010 | This study       |
|                | GSN3030                           | MJW1835 transformed with pGSN4010 | This study       |
|                | GSN3031                           | 14028 transformed with pGSN4011   | This study       |
|                | GSN3032                           | MJW1301 transformed with pGSN4011 | This study       |
|                | GSN3033                           | MJW1835 transformed with pGSN4011 | This study       |
|                | GSN3034                           | 14028 transformed with pGSN4012   | This study       |
|                | GSN3035                           | MJW1301 transformed with pGSN4012 | This study       |
|                | GSN3036                           | MJW1835 transformed with pGSN4012 | This study       |
| GSN3037        | 14028 transformed with pGSN4013   | This study                        |                  |
| GSN3038        | MJW1301 transformed with pGSN4013 | This study                        |                  |
| GSN3039        | MJW1835 transformed with pGSN4013 | This study                        |                  |

|         |                                   |            |
|---------|-----------------------------------|------------|
| GSN3040 | 14028 transformed with pGSN4014   | This study |
| GSN3041 | MJW1301 transformed with pGSN4014 | This study |
| GSN3042 | MJW1835 transformed with pGSN4014 | This study |
| GSN3043 | 14028 transformed with pGSN4015   | This study |
| GSN3044 | MJW1301 transformed with pGSN4015 | This study |
| GSN3045 | MJW1835 transformed with pGSN4015 | This study |
| GSN3046 | 14028 transformed with pGSN4016   | This study |
| GSN3047 | MJW1301 transformed with pGSN4016 | This study |
| GSN3048 | MJW1835 transformed with pGSN4016 | This study |
| GSN3049 | 14028 transformed with pGSN4017   | This study |
| GSN3050 | MJW1301 transformed with pGSN4017 | This study |
| GSN3051 | MJW1835 transformed with pGSN4017 | This study |
| GSN3052 | 14028 transformed with pGSN4018   | This study |
| GSN3053 | MJW1301 transformed with pGSN4018 | This study |
| GSN3054 | MJW1835 transformed with pGSN4018 | This study |
| GSN3055 | 14028 transformed with pGSN4019   | This study |
| GSN3056 | MJW1301 transformed with pGSN4019 | This study |
| GSN3057 | MJW1835 transformed with pGSN4019 | This study |
| GSN3058 | 14028 transformed with pGSN4020   | This study |
| GSN3059 | MJW1301 transformed with pGSN4020 | This study |
| GSN3060 | MJW1835 transformed with pGSN4020 | This study |
| GSN3061 | 14028 transformed with pGSN4021   | This study |
| GSN3062 | MJW1301 transformed with pGSN4021 | This study |
| GSN3063 | MJW1835 transformed with pGSN4021 | This study |
| GSN3064 | 14028 transformed with pGSN4022   | This study |
| GSN3065 | MJW1301 transformed with pGSN4022 | This study |
| GSN3066 | MJW1835 transformed with pGSN4022 | This study |
| GSN3067 | 14028 transformed with pGSN4023   | This study |
| GSN3068 | MJW1301 transformed with pGSN4023 | This study |
| GSN3069 | MJW1835 transformed with pGSN4023 | This study |
| GSN3070 | 14028 transformed with pGSN4024   | This study |
| GSN3071 | MJW1301 transformed with pGSN4024 | This study |
| GSN3072 | MJW1835 transformed with pGSN4024 | This study |
| GSN3073 | 14028 transformed with pGSN4025   | This study |
| GSN3074 | MJW1301 transformed with pGSN4025 | This study |
| GSN3075 | MJW1835 transformed with pGSN4025 | This study |
| GSN3076 | 14028 transformed with pGSN4026   | This study |
| GSN3077 | MJW1301 transformed with pGSN4026 | This study |
| GSN3078 | MJW1835 transformed with pGSN4026 | This study |
| GSN3079 | 14028 transformed with pGSN4027   | This study |
| GSN3080 | MJW1301 transformed with pGSN4027 | This study |
| GSN3081 | MJW1835 transformed with pGSN4027 | This study |
| GSN3082 | 14028 transformed with pGSN4028   | This study |
| GSN3083 | MJW1301 transformed with pGSN4028 | This study |
| GSN3084 | MJW1835 transformed with pGSN4028 | This study |



|         |                                   |            |
|---------|-----------------------------------|------------|
| GSN3085 | 14028 transformed with pGSN4029   | This study |
| GSN3086 | MJW1301 transformed with pGSN4029 | This study |
| GSN3087 | MJW1835 transformed with pGSN4029 | This study |
| GSN3088 | 14028 transformed with pGSN4030   | This study |
| GSN3089 | MJW1301 transformed with pGSN4030 | This study |
| GSN3090 | MJW1835 transformed with pGSN4030 | This study |
| GSN3091 | 14028 transformed with pGSN4031   | This study |
| GSN3092 | MJW1301 transformed with pGSN4031 | This study |
| GSN3093 | MJW1835 transformed with pGSN4031 | This study |
| GSN3094 | 14028 transformed with pGSN4032   | This study |
| GSN3095 | MJW1301 transformed with pGSN4032 | This study |
| GSN3096 | MJW1835 transformed with pGSN4032 | This study |
| GSN3097 | 14028 transformed with pGSN4033   | This study |
| GSN3098 | MJW1301 transformed with pGSN4033 | This study |
| GSN3099 | MJW1835 transformed with pGSN4033 | This study |
| GSN3100 | 14028 transformed with pGSN4034   | This study |
| GSN3101 | MJW1301 transformed with pGSN4034 | This study |
| GSN3102 | MJW1835 transformed with pGSN4034 | This study |
| GSN3103 | 14028 transformed with pGSN4035   | This study |
| GSN3104 | MJW1301 transformed with pGSN4035 | This study |
| GSN3105 | MJW1835 transformed with pGSN4035 | This study |
| GSN3106 | 14028 transformed with pGSN4036   | This study |
| GSN3107 | MJW1301 transformed with pGSN4036 | This study |
| GSN3108 | MJW1835 transformed with pGSN4036 | This study |
| GSN3109 | 14028 transformed with pGSN4037   | This study |
| GSN3110 | MJW1301 transformed with pGSN4037 | This study |
| GSN3111 | MJW1835 transformed with pGSN4037 | This study |
| GSN3112 | 14028 transformed with pGSN4038   | This study |
| GSN3113 | MJW1301 transformed with pGSN4038 | This study |
| GSN3114 | MJW1835 transformed with pGSN4038 | This study |
| GSN3115 | 14028 transformed with pGSN4039   | This study |
| GSN3116 | MJW1301 transformed with pGSN4039 | This study |
| GSN3117 | MJW1835 transformed with pGSN4039 | This study |
| GSN3118 | 14028 transformed with pGSN4040   | This study |
| GSN3119 | MJW1301 transformed with pGSN4040 | This study |
| GSN3120 | MJW1835 transformed with pGSN4040 | This study |
| GSN3121 | 14028 transformed with pGSN4041   | This study |
| GSN3122 | MJW1301 transformed with pGSN4041 | This study |
| GSN3123 | MJW1835 transformed with pGSN4041 | This study |
| GSN3124 | 14028 transformed with pGSN4042   | This study |
| GSN3125 | MJW1301 transformed with pGSN4042 | This study |
| GSN3126 | MJW1835 transformed with pGSN4042 | This study |
| GSN3127 | 14028 transformed with pGSN4043   | This study |
| GSN3128 | MJW1301 transformed with pGSN4043 | This study |
| GSN3129 | MJW1835 transformed with pGSN4043 | This study |

|          |          |                                          |            |
|----------|----------|------------------------------------------|------------|
|          | GSN3130  | 14028 transformed with pGSN4044          | This study |
|          | GSN3131  | MJW1301 transformed with pGSN4044        | This study |
|          | GSN3132  | 14028 transformed with pGSN4045          | This study |
|          | GSN3133  | MJW1301 transformed with pGSN4045        | This study |
|          | GSN3134  | 14028 transformed with pGSN4046          | This study |
|          | GSN3135  | MJW1301 transformed with pGSN4046        | This study |
|          | GSN3136  | 14028 transformed with pGSN4047          | This study |
|          | GSN3137  | MJW1301 transformed with pGSN4047        | This study |
|          | GSN3138  | 14028 transformed with pGSN4048          | This study |
|          | GSN3139  | MJW1301 transformed with pGSN4048        | This study |
|          | GSN3140  | 14028 transformed with pGSN4049          | This study |
|          | GSN3141  | MJW1301 transformed with pGSN4049        | This study |
|          | GSN3142  | 14028 transformed with pGSN4050          | This study |
|          | GSN3143  | MJW1301 transformed with pGSN4050        | This study |
|          | HY4261   | 14028 $\Delta hfq$                       | (3, 4)     |
|          | GSN3144  | HY4261 transformed with pGSN4004         | This study |
|          | GSN3145  | HY4261 transformed with pGSN4022         | This study |
|          | GSN3146  | HY4261 transformed with pGSN4023         | This study |
|          | GSN3147  | HY4261 transformed with pGSN4040         | This study |
|          | GSN3148  | HY4261 transformed with pGSN4043         | This study |
|          | GSN3149  | 14028 transformed with pGSN4051          | This study |
|          | GSN3150  | MJW1301 transformed with pGSN4051        | This study |
|          | GSN3151  | HY4261 transformed with pGSN4051         | This study |
|          | GSN3152  | 14028 transformed with pGSN4052          | This study |
|          | GSN3153  | MJW1301 transformed with pGSN4052        | This study |
|          | GSN3154  | MJW1835 transformed with pGSN4052        | This study |
|          | GSN3155  | 14028 transformed with pGSN4053          | This study |
|          | GSN3156  | MJW1301 transformed with pGSN4053        | This study |
|          | GSN3157  | HY4261 transformed with pGSN4053         | This study |
|          | GSN3057  | 14028 transformed with pGSN2014          | (8)        |
|          | GSN3058  | MJW1301 transformed with pGSN2014        | (8)        |
|          | GSN3158  | HY4261 transformed with pGSN2014         | This study |
|          | GSN3159  | 14028 transformed with pGSN4054          | This study |
|          | GSN3160  | MJW1301 transformed with pGSN4054        | This study |
|          | GSN3161  | HY4261 transformed with pGSN4054         | This study |
|          | GSN3162  | 14028 transformed with pGSN4055          | This study |
|          | GSN3163  | MJW1301 transformed with pGSN4055        | This study |
|          | GSN3164  | HY4261 transformed with pGSN4055         | This study |
|          | GSN3048  | 14028 transformed with pGSN2011          | (8)        |
|          | GSN3049  | MJW1301 transformed with pGSN2011        | (8)        |
|          | GSN3165  | HY4261 transformed with pGSN2011         | This study |
|          | GSN3166  | HY4261 transformed with pGSN4046         | This study |
| Plasmids | pMJW1753 | CyaA' fusion plasmid                     | (2)        |
|          | pGSN4001 | pMJW1753 R17 phage A UTR:: <i>cyaA</i> ' | This study |
|          | pGSN4002 | pMJW1753 <i>sipA</i> UTR:: <i>cyaA</i> ' | This study |

|          |                                               |            |
|----------|-----------------------------------------------|------------|
| pGSN4003 | pMJW1753 <i>steA</i> UTR:: <i>cyaA</i> '      | This study |
| pGSN4004 | pMJW1753 <i>gtgA</i> UTR:: <i>cyaA</i> '      | This study |
| pGSN4005 | pMJW1753 <i>sipB</i> UTR:: <i>cyaA</i> '      | This study |
| pGSN4006 | pMJW1753 <i>sipC</i> UTR:: <i>cyaA</i> '      | This study |
| pGSN4007 | pMJW1753 <i>sipD</i> UTR:: <i>cyaA</i> '      | This study |
| pGSN4008 | pMJW1753 <i>sopA</i> UTR:: <i>cyaA</i> '      | This study |
| pGSN4009 | pMJW1753 <i>sopB</i> UTR:: <i>cyaA</i> '      | This study |
| pGSN4010 | pMJW1753 <i>sopD</i> UTR:: <i>cyaA</i> '      | This study |
| pGSN4011 | pMJW1753 <i>sopE2</i> UTR:: <i>cyaA</i> '     | This study |
| pGSN4012 | pMJW1753 <i>avrA</i> UTR:: <i>cyaA</i> '      | This study |
| pGSN4013 | pMJW1753 <i>gtgE</i> UTR:: <i>cyaA</i> '      | This study |
| pGSN4014 | pMJW1753 <i>slrP</i> UTR:: <i>cyaA</i> '      | This study |
| pGSN4015 | pMJW1753 <i>sptP</i> UTR:: <i>cyaA</i> '      | This study |
| pGSN4016 | pMJW1753 <i>spvC</i> UTR:: <i>cyaA</i> '      | This study |
| pGSN4017 | pMJW1753 <i>spvD</i> UTR:: <i>cyaA</i> '      | This study |
| pGSN4018 | pMJW1753 <i>sseK1</i> UTR:: <i>cyaA</i> '     | This study |
| pGSN4019 | pMJW1753 <i>sspH1</i> UTR:: <i>cyaA</i> '     | This study |
| pGSN4020 | pMJW1753 <i>steB</i> UTR:: <i>cyaA</i> '      | This study |
| pGSN4021 | pMJW1753 <i>steE</i> UTR:: <i>cyaA</i> '      | This study |
| pGSN4022 | pMJW1753 <i>cigR</i> UTR:: <i>cyaA</i> '      | This study |
| pGSN4023 | pMJW1753 <i>gogB</i> UTR:: <i>cyaA</i> '      | This study |
| pGSN4024 | pMJW1753 <i>srjH</i> UTR:: <i>cyaA</i> '      | This study |
| pGSN4025 | pMJW1753 <i>pipB</i> UTR:: <i>cyaA</i> '      | This study |
| pGSN4026 | pMJW1753 <i>pipB2</i> UTR:: <i>cyaA</i> '     | This study |
| pGSN4027 | pMJW1753 <i>sifA</i> UTR:: <i>cyaA</i> '      | This study |
| pGSN4028 | pMJW1753 <i>sifB</i> UTR:: <i>cyaA</i> '      | This study |
| pGSN4029 | pMJW1753 <i>sopD2</i> UTR:: <i>cyaA</i> '     | This study |
| pGSN4030 | pMJW1753 <i>spiC</i> UTR:: <i>cyaA</i> '      | This study |
| pGSN4031 | pMJW1753 <i>spvB</i> UTR:: <i>cyaA</i> '      | This study |
| pGSN4032 | pMJW1753 <i>sseB</i> UTR:: <i>cyaA</i> '      | This study |
| pGSN4033 | pMJW1753 <i>sseC</i> UTR:: <i>cyaA</i> '      | This study |
| pGSN4034 | pMJW1753 <i>sseD</i> UTR:: <i>cyaA</i> '      | This study |
| pGSN4035 | pMJW1753 <i>sseF</i> UTR:: <i>cyaA</i> '      | This study |
| pGSN4036 | pMJW1753 <i>sseG</i> UTR:: <i>cyaA</i> '      | This study |
| pGSN4037 | pMJW1753 <i>sseJ</i> UTR:: <i>cyaA</i> '      | This study |
| pGSN4038 | pMJW1753 <i>sseK2</i> UTR:: <i>cyaA</i> '     | This study |
| pGSN4039 | pMJW1753 <i>sseK3</i> UTR:: <i>cyaA</i> '     | This study |
| pGSN4040 | pMJW1753 <i>sseL</i> UTR:: <i>cyaA</i> '      | This study |
| pGSN4041 | pMJW1753 <i>sspH2</i> UTR:: <i>cyaA</i> '     | This study |
| pGSN4042 | pMJW1753 <i>steC</i> UTR:: <i>cyaA</i> '      | This study |
| pGSN4043 | pMJW1753 <i>steD</i> UTR:: <i>cyaA</i> '      | This study |
| pGSN4044 | pMJW1753 <i>gtgA</i> 5 bp UTR:: <i>cyaA</i> ' | This study |
| pGSN4045 | pMJW1753 <i>gtgA</i> 6 bp UTR:: <i>cyaA</i> ' | This study |
| pGSN4046 | pMJW1753 <i>gtgA</i> 7 bp UTR:: <i>cyaA</i> ' | This study |
| pGSN4047 | pGSN4052 AGA → CGA point mutant               | This study |

|  |          |                                                            |            |
|--|----------|------------------------------------------------------------|------------|
|  | pGSN4048 | pGSN4052 AGA → ATA point mutant                            | This study |
|  | pGSN4049 | pGSN4052 AGA → AGC point mutant                            | This study |
|  | pGSN4050 | pGSN4052 AGA → CTC point mutant                            | This study |
|  | pGSN4051 | pMJW1753 <i>spvD</i> <sub>1-90</sub> :: <i>cyaA</i> '      | This study |
|  | pGSN4052 | pMJW1753 <i>gtgA</i> UTR:: <i>enolase</i> :: <i>cyaA</i> ' | This study |
|  | pGSN4053 | pMJW1753 <i>gtgA</i> :: <i>cyaA</i> '                      | This study |
|  | pGSN2014 | pMJW1753 <i>cigR</i> :: <i>cyaA</i> '                      | (8)        |
|  | pGSN4055 | pMJW1753 <i>gogB</i> :: <i>cyaA</i> '                      | This study |
|  | pGSN2014 | pMJW1753 <i>sseL</i> :: <i>cyaA</i> '                      | This study |
|  | pGSN2011 | pMJW1753 <i>steD</i> :: <i>cyaA</i> '                      | (8)        |

**Supplemental Table 2. Oligonucleotide primers used in this study.**

| <b>For/Rev</b> | <b>5'-Sequence-3'</b>                                 | <b>Description</b> |
|----------------|-------------------------------------------------------|--------------------|
| Forward        | CTGATCTAGAAGGAGGTTTGACCTATGCAGCTGGTAC                 | pGSN4001           |
| Reverse        | GTACCAGCTGCATAGGTCAAACCTCCTTCTAGATCAG                 |                    |
| Forward        | CTGATCTAGAAGGATAACAGAAGAGGATATTAATAATGC<br>AGCTGGTAC  | pGSN4002           |
| Reverse        | GTACCAGCTGCATTATTAATATCCTCTTCTGTTATCCTTCT<br>AGATCAG  |                    |
| Forward        | CTGATCTAGATGAGCAAAATTTGAAGGAGTAGGATATGC<br>AGCTGGTAC  | pGSN4003           |
| Reverse        | GTACCAGCTGCATATCCTACTCCTTCAAATTTTGCTCATCT<br>AGATCAG  |                    |
| Forward        | CTGATCTAGACGATGATAAAGCCAGGCTGGAACCAATGC<br>AGCTGGTAC  | pGSN4004           |
| Reverse        | GTACCAGCTGCATTGGTCCAGCCTGGCTTTATCATCGTC<br>TAGATCAG   |                    |
| Forward        | CTGATCTAGAACAGTGAACAAGAAAAGGAATAATTATGC<br>AGCTGGTAC  | pGSN4005           |
| Reverse        | GTACCAGCTGCATAATTATTCCTTTTCTTGTTCACTGTTCT<br>AGATCAG  |                    |
| Forward        | CTGATCTAGAAGTCCAAAATAAAGGGAGAAAAATATGC<br>AGCTGGTAC   | pGSN4006           |
| Reverse        | GTACCAGCTGCATATTTTCTCCCTTTATTTTGGCAGTTCT<br>AGATCAG   |                    |
| Forward        | CTGATCTAGACTCCTGATGGCGAACTGGGGATATTATGCA<br>GCTGGTAC  | pGSN4007           |
| Reverse        | GTACCAGCTGCATAATATCCCCAGTTCGCCATCAGGAGTC<br>TAGATCAG  |                    |
| Forward        | CTGATCTAGAATAATGATGTTGATAAGGAATTCTAATGCA<br>GCTGGTAC  | pGSN4008           |
| Reverse        | GTACCAGCTGCATTAGAATTCCTTATCAACATCATTATTC<br>TAGATCAG  |                    |
| Forward        | CTGATCTAGACCTATTCAGGAATATTA AAAACGCTATGCA<br>GCTGGTAC | pGSN4009           |
| Reverse        | GTACCAGCTGCATAGCGTTTTTAATATTCCTGAATAGGTC<br>TAGATCAG  |                    |
| Forward        | CTGATCTAGATAATATAAATTTGAAGGAAAATATTATGC<br>AGCTGGTAC  | pGSN4010           |
| Reverse        | GTACCAGCTGCATAATATTTTCCTTCAAATTTATATTATCT<br>AGATCAG  |                    |
| Forward        | CTGATCTAGAATAGTTATCTAAAAGGAGA ACTACCGTGC<br>AGCTGGTAC | pGSN4011           |
| Reverse        | GTACCAGCTGCACGGTAGTTCTCCTTTTAGATAACTATTC<br>TAGATCAG  |                    |
| Forward        | CTGATCTAGAATATATTAAATCTGAAAAGTTAAAGATGC<br>AGCTGGTAC  | pGSN4012           |
| Reverse        | GTACCAGCTGCATCTTTAACTTTTCAGATTTAATATATCT<br>AGATCAG   |                    |
| Forward        | CTGATCTAGAAAAATTACTATTCGGCGAGTATATTATGCA<br>GCTGGTAC  | pGSN4013           |
| Reverse        | GTACCAGCTGCATAATATACTCGCCGAATAGTAATTTTTC<br>TAGATCAG  |                    |

|         |                                                       |          |
|---------|-------------------------------------------------------|----------|
| Forward | CTGATCTAGATACGTTTCAGATCAGGTAGGGAAAATATGC<br>AGCTGGTAC | pGSN4014 |
| Reverse | GTACCAGCTGCATATTTTCCCTACCTGATCTGAACGTATC<br>TAGATCAG  |          |
| Forward | CTGATCTAGAGCGCTCAAAAACATACTGCAGGAATATGC<br>AGCTGGTAC  | pGSN4015 |
| Reverse | GTACCAGCTGCATATTCCTGCAGTATGTTTTTGAGCGCTC<br>TAGATCAG  |          |
| Forward | CTGATCTAGAATCCATATCGCAAAGGAGATTTCCCATGCA<br>GCTGGTAC  | pGSN4016 |
| Reverse | GTACCAGCTGCATGGGAAATCTCCTTTGCGATATGGATTC<br>TAGATCAG  |          |
| Forward | CTGATCTAGATGCATTTTATTGAGGTAGTGTAACATGCA<br>GCTGGTAC   | pGSN4017 |
| Reverse | GTACCAGCTGCATAGTTACACTACCTCAATAAAAATGCATC<br>TAGATCAG |          |
| Forward | CTGATCTAGAAGTAAGTATGGAGCATTAAATTGTTATGCA<br>GCTGGTAC  | pGSN4018 |
| Reverse | GTACCAGCTGCATAACAATTAATGCTCCATACTTACTTC<br>TAGATCAG   |          |
| Forward | CTGATCTAGATGTGCTGTAAATTAGGCAGTGAATATGC<br>AGCTGGTAC   | pGSN4019 |
| Reverse | GTACCAGCTGCATATTCCACTGCCTAATTTACAGCACATC<br>TAGATCAG  |          |
| Forward | CTGATCTAGATGAAATCAATCTCAGGTAATAATCCATGCA<br>GCTGGTAC  | pGSN4020 |
| Reverse | GTACCAGCTGCATGGATTATTACCTGAGATTGATTCATC<br>TAGATCAG   |          |
| Forward | CTGATCTAGATGTAAAAGGGTCTCCTCTTGTTGTGATGCA<br>GCTGGTAC  | pGSN4021 |
| Reverse | GTACCAGCTGCATCACAACAAGAGGAGACCCTTTTACAT<br>CTAGATCAG  |          |
| Forward | CTGATCTAGATATCCCACATCAGAAGGGCAATATCATGC<br>AGCTGGTAC  | pGSN4022 |
| Reverse | GTACCAGCTGCATGATATTGCCCTTCTGATGTGGGATATC<br>TAGATCAG  |          |
| Forward | CTGATCTAGATAAATGTAATAATGATAGCTTGGTATTGCA<br>GCTGGTAC  | pGSN4023 |
| Reverse | GTACCAGCTGCAATACCAAGCTATCATTATTACATTTATC<br>TAGATCAG  |          |
| Forward | CTGATCTAGATGTAAATTTATAAAGGTTTTTTGTTATGCA<br>GCTGGTAC  | pGSN4024 |
| Reverse | GTACCAGCTGCATAACAAAAACCTTTATAAATTTACATC<br>TAGATCAG   |          |
| Forward | CTGATCTAGACTCACTTCCATAAGAAGGAATCAAATGC<br>AGCTGGTAC   | pGSN4025 |
| Reverse | GTACCAGCTGCATTTTGATTCCTTCTTATGGAAGTGAGTC<br>TAGATCAG  |          |
| Forward | CTGATCTAGATGTTGCTGTCTCTGGGAGAAAATATATGCA<br>GCTGGTAC  | pGSN4026 |
| Reverse | GTACCAGCTGCATATATTTTCTCCAGAGACAGCAACATC<br>TAGATCAG   |          |
| Forward | CTGATCTAGATTACTCCAGTATAAGTGAGATTAATATGCA<br>GCTGGTAC  | pGSN4027 |

|         |                                                       |          |
|---------|-------------------------------------------------------|----------|
| Reverse | GTACCAGCTGCATATTAATCTCACTTATACTGGAGTAATC<br>TAGATCAG  |          |
| Forward | CTGATCTAGACATATAATCACTTGTGGTCTACATTATGCA<br>GCTGGTAC  | pGSN4028 |
| Reverse | GTACCAGCTGCATAATGTAGACCACAAGTGATTATATGTC<br>TAGATCAG  |          |
| Forward | CTGATCTAGAGCGGTAAATAATCAAGGGAGTTATTATGC<br>AGCTGGTAC  | pGSN4029 |
| Reverse | GTACCAGCTGCATAATAACTCCCTTGATTATTTACCGCTC<br>TAGATCAG  |          |
| Forward | CTGATCTAGAGCGAATTTGATAGAACTCCATTTATGCA<br>GCTGGTAC    | pGSN4030 |
| Reverse | GTACCAGCTGCATAAATGGGAGTTTCTATCAAATTCGCTC<br>TAGATCAG  |          |
| Forward | CTGATCTAGAGACGGCCAGTTTCAGGAGATAGTGTATGC<br>AGCTGGTAC  | pGSN4031 |
| Reverse | GTACCAGCTGCATACACTATCTCCTGAAACTGGCCGTCTC<br>TAGATCAG  |          |
| Forward | CTGATCTAGAAGGAAAAACAAAAGGTAAAGCATAATGC<br>AGCTGGTAC   | pGSN4032 |
| Reverse | GTACCAGCTGCATTATGCTTTACCTTTTTGTTTTCTTCT<br>AGATCAG    |          |
| Forward | CTGATCTAGAAGCAACTTTCTGACAGGAGCTAAAAATGC<br>AGCTGGTAC  | pGSN4033 |
| Reverse | GTACCAGCTGCATTTTTAGCTCCTGTCAGAAAGTTGCTTC<br>TAGATCAG  |          |
| Forward | CTGATCTAGATCGCGCTTAATCTGAGGATAAAAATATGC<br>AGCTGGTAC  | pGSN4034 |
| Reverse | GTACCAGCTGCATATTTTTATCCTCAGATTAAGCGCGATC<br>TAGATCAG  |          |
| Forward | CTGATCTAGATATTGCTTAAATAACAGAACGAAATATGC<br>AGCTGGTAC  | pGSN4035 |
| Reverse | GTACCAGCTGCATATTTTCGTTCTGTTATTTAAGCAATATC<br>TAGATCAG |          |
| Forward | CTGATCTAGACTGATCATACATCTCGGGGAGAACCATGC<br>AGCTGGTAC  | pGSN4036 |
| Reverse | GTACCAGCTGCATGGTTCTCCCCGAGATGTATGATCAGTC<br>TAGATCAG  |          |
| Forward | CTGATCTAGATGTTTAATAAAGTAAGGAGGACACTATGC<br>AGCTGGTAC  | pGSN4037 |
| Reverse | GTACCAGCTGCATAGTGTCTCCTTACTTTATTAACATC<br>TAGATCAG    |          |
| Forward | CTGATCTAGAACTGATAATTTAAGCGTGAAAAATATGC<br>AGCTGGTAC   | pGSN4038 |
| Reverse | GTACCAGCTGCATATTTTTACACGCTTAAATTATCAGTTC<br>TAGATCAG  |          |
| Forward | CTGATCTAGAATATTAATAGCGTAAGGGTTGAAAAATGC<br>AGCTGGTAC  | pGSN4039 |
| Reverse | GTACCAGCTGCATTTTTCAACCCTTACGCTATTAATATTCT<br>AGATCAG  |          |
| Forward | CTGATCTAGAATTTACAGCTTATATACAGAAGAGGTGC<br>AGCTGGTAC   | pGSN4040 |
| Reverse | GTACCAGCTGCACCTCTTCTGTATATAAGCTGTGAAATTC<br>TAGATCAG  |          |

|         |                                                                                                                                                                                                                                                 |                                   |
|---------|-------------------------------------------------------------------------------------------------------------------------------------------------------------------------------------------------------------------------------------------------|-----------------------------------|
| Forward | CTGATCTAGATGTAAATTTATAAAGGTTTTTTTGTATGCA<br>GCTGGTAC                                                                                                                                                                                            | pGSN4041                          |
| Reverse | GTACCAGCTGCATAACAAAAACCTTTATAAATTTACATC<br>TAGATCAG                                                                                                                                                                                             |                                   |
| Forward | CTGATCTAGAAATAAATTTTCAGAGGATGAGACATATGC<br>AGCTGGTAC                                                                                                                                                                                            | pGSN4042                          |
| Reverse | GTACCAGCTGCATATGTCTCATCCTCTGAAAATTTATTT<br>TAGATCAG                                                                                                                                                                                             |                                   |
| Forward | CTGATCTAGACAGGCATGTGCATGAAGAGGTTTATATGC<br>AGCTGGTAC                                                                                                                                                                                            | pGSN4043                          |
| Reverse | GTACCAGCTGCATATAAACCTCTTCATGCACATGCCTGTC<br>TAGATCAG                                                                                                                                                                                            |                                   |
| Forward | CTGATCTAGAAACCAATGCAGCTGGTAC                                                                                                                                                                                                                    | pGSN4044                          |
| Reverse | GTACCAGCTGCATTGGTTTCTAGATCAG                                                                                                                                                                                                                    |                                   |
| Forward | CTGATCTAGAGAACCAATGCAGCTGGTAC                                                                                                                                                                                                                   | pGSN4045                          |
| Reverse | GTACCAGCTGCATTGGTTTCTAGATCAG                                                                                                                                                                                                                    |                                   |
| Forward | CTGATCTAGAGGAACCAATGCAGCTGGTAC                                                                                                                                                                                                                  | pGSN4046                          |
| Reverse | GTACCAGCTGCATTGGTTCCTCTAGATCAG                                                                                                                                                                                                                  |                                   |
| Forward | CACCGCGGTGGCGGCCGCTCTCGAGGAACCAATGCAGGG<br>GCAGCA                                                                                                                                                                                               | pGSN4047                          |
| Reverse | TGCTGCCCTGCATTGGTTCCTCGAGAGCGGCCGCCACCG<br>CGGTG                                                                                                                                                                                                |                                   |
| Forward | CACCGCGGTGGCGGCCGCTCTATAGGAACCAATGCAGGG<br>GCAGCA                                                                                                                                                                                               | pGSN4048                          |
| Reverse | TGCTGCCCTGCATTGGTTCCTATAGAGCGGCCGCCACCG<br>CGGTG                                                                                                                                                                                                |                                   |
| Forward | CACCGCGGTGGCGGCCGCTCTAGCGGAACCAATGCAGGG<br>GCAGCA                                                                                                                                                                                               | pGSN4049                          |
| Reverse | TGCTGCCCTGCATTGGTTCGCTAGAGCGGCCGCCACCG<br>CGGTG                                                                                                                                                                                                 |                                   |
| Forward | CACCGCGGTGGCGGCCGCTCTCTCGGAACCAATGCAGGG<br>GCAGCA                                                                                                                                                                                               | pGSN4050                          |
| Reverse | TGCTGCCCTGCATTGGTTCGAGAGAGCGGCCGCCACC<br>GCGGTG                                                                                                                                                                                                 |                                   |
| Forward | TAATACGACTCACTATAGGGAGAAAAAAAAAAAAAAAAAAGC<br>CCGATAGCTCAGTCGGTAGAGCAGCGGCCTCGACCAGA<br>ATCATGCAAGTGCGTAAGATAGTCGCGGGTCGAGGCCGC<br>GTCCAGGGTTCAAGTCCCTGTTTCGGGCGCCACTGCAGAA<br>AAAAAAAAAATCTAGATGCATTTTATTGAGGTAGTGTA<br>CTATGCAGGGGCAGCAATCGC  | pGSN4051                          |
| Reverse | TAATACGACTCACTATAGGGAGAAAAAAAAAAAAAAAAAAGC<br>CCGATAGCTCAGTCGGTAGAGCAGCGGCCTCGACCAGA<br>ATCATGCAAGTGCGTAAGATAGTCGCGGGTCGAGGCCGC<br>GTCCAGGGTTCAAGTCCCTGTTTCGGGCGCCACTGCAGAA<br>AAAAAAAAAATCTAGACGATGATAAAGCCAGGCTGGAA<br>CCAATGCAGGGGCAGCAATCGC |                                   |
| Forward | TAATACGACTCACTATAGGGAGA                                                                                                                                                                                                                         | pGSN4052                          |
| Reverse | GCGATTGCTGCCCCCTG                                                                                                                                                                                                                               |                                   |
| Forward | CCGATAAAACCGGCACGAT                                                                                                                                                                                                                             | tRSA:: <i>spvD</i> UTR<br>aptamer |
| Forward | TGACGTTGGTGAAGGTTTCG                                                                                                                                                                                                                            | tRSA:: <i>gtgA</i> UTR<br>aptamer |
| Forward | ATCCCCGCAGCCGTACTC                                                                                                                                                                                                                              | tRSA primers                      |



|         |                                                                 |                      |
|---------|-----------------------------------------------------------------|----------------------|
| Reverse | TCAATGTGGCGTTTTTTTCCT                                           |                      |
| Forward | CTGATCTAGATGCATTTTATTGAGGTAGTGTAACATGAG                         | <i>gyrB</i> qRT-PCR  |
| Reverse | GTACCAGCTGCTTGACTTCATTTGAATCATTATTA                             |                      |
| Forward | CTGATCTAGACGATGATAAAGCCAGGCTGGAACCAATGT<br>CCAAAATCGTTAAAGTCATC | <i>cyaA'</i> qRT-PCR |
| Reverse | GTACCCCGGGCGCCTGGCCTTTGATCTC                                    |                      |
| Forward | CTGATCTAGATAATAAAAAGGATGTGTAACATC                               | pGSN4053             |
| Reverse | GTACCAGCTGATTACTAAATTCGTAGGCGATTCTTGG                           |                      |
| Forward | CTGATCTAGATAAATGTAATAATGATAGCTTGGTATTGAC<br>ATA                 | pGSN4054             |
| Reverse | GTACCAGCTGACGATTTCTATTTTTAGGCTTATATTTATCC                       |                      |
| Forward | CTGATCTAGAATTCACAGCTTATATACAGAAGA                               | pGSN4055             |
| Reverse | GTACGATATCCTGGAGACTGTATTCATATATTTG                              |                      |

**Supplemental Table 3. Screen for RNA Leader Sequences Sufficient for CyaA' Secretion.**

| Infection Conditions | UTR          | <i>S. Typhimurium</i> Background | cAMP (pmol/mL) | Standard Deviation | Secreted |
|----------------------|--------------|----------------------------------|----------------|--------------------|----------|
| SPI-1                | R17 phage A  | WT                               | 0.69           | 0.03               | No       |
|                      |              | <i>invA::cat</i>                 | 0.73           | 0.28               |          |
|                      | <i>sipA</i>  | WT                               | 1.753          | 0.316              | No       |
|                      |              | <i>invA::cat</i>                 | 1.75           | 0.84               |          |
|                      | <i>sipB</i>  | WT                               | 1.411          | 0.109              | No       |
|                      |              | <i>invA::cat</i>                 | 1.656          | 0.045              |          |
|                      | <i>sipC</i>  | WT                               | 1.392          | 0.753              | No       |
|                      |              | <i>invA::cat</i>                 | 4.288          | 0.284              |          |
|                      | <i>sipD</i>  | WT                               | 0.855          | 0.368              | No       |
|                      |              | <i>invA::cat</i>                 | 1.436          | 0.058              |          |
|                      | <i>sopA</i>  | WT                               | 0.700          | 0.241              | No       |
|                      |              | <i>invA::cat</i>                 | 2.187          | 0.241              |          |
|                      | <i>sopB</i>  | WT                               | 1.259          | 0.078              | No       |
|                      |              | <i>invA::cat</i>                 | 2.214          | 0.485              |          |
|                      | <i>sopD</i>  | WT                               | 3.358          | 0.134              | No       |
|                      |              | <i>invA::cat</i>                 | 9.203          | 0.508              |          |
|                      | <i>sopE2</i> | WT                               | 0.998          | 0.139              | No       |
|                      |              | <i>invA::cat</i>                 | 1.760          | 0.613              |          |
|                      | <i>avrA</i>  | WT                               | 1.857          | 0.194              | No       |
|                      |              | <i>invA::cat</i>                 | 2.711          | 0.323              |          |
|                      | <i>gtgE</i>  | WT                               | 1.086          | 0.336              | No       |
|                      |              | <i>invA::cat</i>                 | 1.261          | 0.085              |          |
|                      | <i>slrP</i>  | WT                               | 1.461          | 0.442              | No       |
|                      |              | <i>invA::cat</i>                 | 2.365          | 0.052              |          |
|                      | <i>sptP</i>  | WT                               | 1.144          | 0.139              | No       |
|                      |              | <i>invA::cat</i>                 | 2.391          | 0.493              |          |
|                      | <i>spvC</i>  | WT                               | 4.536          | 2.343              | No       |
|                      |              | <i>invA::cat</i>                 | 15.260         | 0.303              |          |
|                      | <i>spvD</i>  | WT                               | 0.775          | 0.234              | No       |
|                      |              | <i>invA::cat</i>                 | 1.514          | 0.080              |          |
|                      | <i>sseK1</i> | WT                               | 1.082          | 0.481              | No       |
|                      |              | <i>invA::cat</i>                 | 1.429          | 0.135              |          |
|                      | <i>sspH1</i> | WT                               | 0.542          | 0.195              | No       |
|                      |              | <i>invA::cat</i>                 | 1.525          | 0.003              |          |
|                      | <i>steA</i>  | WT                               | 2.233          | 0.62               | No       |
|                      |              | <i>invA::cat</i>                 | 2.767          | 0.09               |          |
|                      | <i>steB</i>  | WT                               | 0.911          | 0.192              | No       |
|                      |              | <i>invA::cat</i>                 | 1.637          | 0.101              |          |
|                      | <i>steE</i>  | WT                               | 1.755          | 0.043              | No       |
|                      |              | <i>invA::cat</i>                 | 3.117          | 0.309              |          |
|                      | <i>cigR</i>  | WT                               | 0.930          | 0.320              | No       |
|                      |              | <i>invA::cat</i>                 | 1.937          | 0.086              |          |
|                      | <i>gogB</i>  | WT                               | 2.014          | 0.178              | No       |
|                      |              | <i>invA::cat</i>                 | 2.632          | 0.250              |          |
|                      | <i>gtgA</i>  | WT                               | 14.290         | 1.607              | Yes      |
|                      |              | <i>invA::cat</i>                 | 5.313          | 0.714              |          |
|                      | <i>pipB</i>  | WT                               | 0.564          | 0.100              | No       |
|                      |              | <i>invA::cat</i>                 | 1.286          | 0.116              |          |

|              |                  |                  |       |       |    |
|--------------|------------------|------------------|-------|-------|----|
|              | <i>pipB2</i>     | WT               | 1.927 | 0.030 | No |
|              |                  | <i>invA::cat</i> | 2.878 | 0.374 |    |
|              | <i>sifA</i>      | WT               | 1.660 | 0.400 | No |
|              |                  | <i>invA::cat</i> | 1.355 | 0.326 |    |
|              | <i>sifB</i>      | WT               | 0.743 | 0.452 | No |
|              |                  | <i>invA::cat</i> | 1.214 | 0.142 |    |
|              | <i>sopD2</i>     | WT               | 1.004 | 0.279 | No |
|              |                  | <i>invA::cat</i> | 1.615 | 0.469 |    |
|              | <i>spiC</i>      | WT               | 0.922 | 0.285 | No |
|              |                  | <i>invA::cat</i> | 1.659 | 0.336 |    |
|              | <i>spvB</i>      | WT               | 1.469 | 0.037 | No |
|              |                  | <i>invA::cat</i> | 1.653 | 0.045 |    |
|              | <i>srfH</i>      | WT               | 0.952 | 0.11  | No |
|              |                  | <i>invA::cat</i> | 1.090 | 0.06  |    |
|              | <i>sseB</i>      | WT               | 1.289 | 0.576 | No |
|              |                  | <i>invA::cat</i> | 1.333 | 0.195 |    |
|              | <i>sseC</i>      | WT               | 1.710 | 0.388 | No |
|              |                  | <i>invA::cat</i> | 2.397 | 0.105 |    |
|              | <i>sseD</i>      | WT               | 1.935 | 0.603 | No |
|              |                  | <i>invA::cat</i> | 2.117 | 0.221 |    |
|              | <i>sseF</i>      | WT               | 0.905 | 0.078 | No |
|              |                  | <i>invA::cat</i> | 1.472 | 0.692 |    |
|              | <i>sseG</i>      | WT               | 0.988 | 0.061 | No |
|              |                  | <i>invA::cat</i> | 1.176 | 0.093 |    |
|              | <i>sseJ</i>      | WT               | 7.000 | 0.800 | No |
|              |                  | <i>invA::cat</i> | 5.548 | 0.810 |    |
|              | <i>sseK2</i>     | WT               | 1.448 | 0.374 | No |
|              |                  | <i>invA::cat</i> | 1.458 | 0.242 |    |
|              | <i>sseK3</i>     | WT               | 1.021 | 0.070 | No |
|              |                  | <i>invA::cat</i> | 1.490 | 0.058 |    |
|              | <i>sseL</i>      | WT               | 1.796 | 0.036 | No |
|              |                  | <i>invA::cat</i> | 1.376 | 0.023 |    |
| <i>sspH2</i> | WT               | 1.634            | 0.181 | No    |    |
|              | <i>invA::cat</i> | 1.021            | 1.059 |       |    |
| <i>steC</i>  | WT               | 2.685            | 0.253 | No    |    |
|              | <i>invA::cat</i> | 2.946            | 0.164 |       |    |
| <i>steD</i>  | WT               | 4.579            | 0.123 | No    |    |
|              | <i>invA::cat</i> | 2.518            | 0.292 |       |    |
| SPI-2        | R17 phage A      | WT               | 0.807 | 0.128 | No |
|              |                  | <i>ssaK::cat</i> | 0.244 | 0.062 |    |
|              | <i>sipA</i>      | WT               | 0.435 | 0.087 | No |
|              |                  | <i>ssaK::cat</i> | 0.042 | 0.002 |    |
|              | <i>sipB</i>      | WT               | 1.559 | 0.671 | No |
|              |                  | <i>ssaK::cat</i> | 0.319 | 0.062 |    |
|              | <i>sipC</i>      | WT               | 1.022 | 0.150 | No |
|              |                  | <i>ssaK::cat</i> | 0.211 | 0.104 |    |
|              | <i>sipD</i>      | WT               | 0.634 | 0.450 | No |
|              |                  | <i>ssaK::cat</i> | 0.391 | 0.142 |    |
|              | <i>sopA</i>      | WT               | 0.574 | 0.080 | No |
|              |                  | <i>ssaK::cat</i> | 0.220 | 0.020 |    |
| <i>sopB</i>  | WT               | 1.110            | 0.132 | No    |    |
|              | <i>ssaK::cat</i> | 0.467            | 0.120 |       |    |
| <i>sopD</i>  | WT               | 6.336            | 0.431 | No    |    |

|              |  |                  |         |       |      |
|--------------|--|------------------|---------|-------|------|
|              |  | <i>ssaK::cat</i> | 3.607   | 0.477 |      |
| <i>sopE2</i> |  | WT               | 1.074   | 0.140 | No   |
|              |  | <i>ssaK::cat</i> | 0.286   | 0.038 |      |
| <i>avrA</i>  |  | WT               | 3.765   | 0.449 | No   |
|              |  | <i>ssaK::cat</i> | 0.920   | 0.035 |      |
| <i>gtgE</i>  |  | WT               | 1.445   | 0.080 | No   |
|              |  | <i>ssaK::cat</i> | 0.236   | 0.061 |      |
| <i>slrP</i>  |  | WT               | 6.179   | 2.845 | No   |
|              |  | <i>ssaK::cat</i> | 0.895   | 0.142 |      |
| <i>sptP</i>  |  | WT               | 4.512   | 1.069 | No   |
|              |  | <i>ssaK::cat</i> | 1.803   | 0.057 |      |
| <i>spvC</i>  |  | WT               | 4.692   | 0.129 | No   |
|              |  | <i>ssaK::cat</i> | 0.570   | 0.044 |      |
| <i>spvD</i>  |  | WT               | 1.103   | 0.233 | No   |
|              |  | <i>ssaK::cat</i> | 0.705   | 0.269 |      |
| <i>sseK1</i> |  | WT               | 3.921   | 0.036 | No   |
|              |  | <i>ssaK::cat</i> | 0.251   | 0.000 |      |
| <i>sspH1</i> |  | WT               | 0.531   | 0.136 | No   |
|              |  | <i>ssaK::cat</i> | 0.299   | 0.047 |      |
| <i>steA</i>  |  | WT               | 0.105   | 0.08  | No   |
|              |  | <i>ssaK::cat</i> | 0.063   | 0.02  |      |
| <i>steB</i>  |  | WT               | 1.475   | 0.539 | No   |
|              |  | <i>ssaK::cat</i> | 1.307   | 0.106 |      |
| <i>steE</i>  |  | WT               | 10.664  | 2.294 | Weak |
|              |  | <i>ssaK::cat</i> | 0.362   | 0.027 |      |
| <i>cigR</i>  |  | WT               | 46.045  | 4.245 | Yes  |
|              |  | <i>ssaK::cat</i> | 2.805   | 2.805 |      |
| <i>gogB</i>  |  | WT               | 24.293  | 2.151 | Yes  |
|              |  | <i>ssaK::cat</i> | 0.435   | 0.156 |      |
| <i>gtgA</i>  |  | WT               | 136.521 | 4.082 | Yes  |
|              |  | <i>ssaK::cat</i> | 2.256   | 0.614 |      |
| <i>pipB</i>  |  | WT               | 0.243   | 0.048 | No   |
|              |  | <i>ssaK::cat</i> | 0.582   | 0.021 |      |
| <i>pipB2</i> |  | WT               | 3.015   | 1.106 | No   |
|              |  | <i>ssaK::cat</i> | 0.191   | 0.195 |      |
| <i>sifA</i>  |  | WT               | 6.489   | 1.837 | No   |
|              |  | <i>ssaK::cat</i> | 1.116   | 0.157 |      |
| <i>sifB</i>  |  | WT               | 0.128   | 0.007 | No   |
|              |  | <i>ssaK::cat</i> | 0.101   | 0.045 |      |
| <i>sopD2</i> |  | WT               | 1.107   | 0.072 | No   |
|              |  | <i>ssaK::cat</i> | 0.734   | 0.162 |      |
| <i>spiC</i>  |  | WT               | 0.412   | 0.104 | No   |
|              |  | <i>ssaK::cat</i> | 0.340   | 0.004 |      |
| <i>spvB</i>  |  | WT               | 1.481   | 0.206 | No   |
|              |  | <i>ssaK::cat</i> | 1.357   | 0.533 |      |
| <i>srfH</i>  |  | WT               | 0.985   | 0.165 | No   |
|              |  | <i>ssaK::cat</i> | 0.239   | 0.187 |      |
| <i>sseB</i>  |  | WT               | 1.376   | 0.270 | No   |
|              |  | <i>ssaK::cat</i> | 1.952   | 0.422 |      |
| <i>sseC</i>  |  | WT               | 1.978   | 0.816 | No   |
|              |  | <i>ssaK::cat</i> | 0.220   | 0.052 |      |
| <i>sseD</i>  |  | WT               | 1.680   | 0.285 | No   |
|              |  | <i>ssaK::cat</i> | 0.800   | 0.144 |      |

|              |                  |        |       |     |
|--------------|------------------|--------|-------|-----|
| <i>sseF</i>  | WT               | 0.124  | 0.060 | No  |
|              | <i>ssaK::cat</i> | 0.056  | 0.002 |     |
| <i>sseG</i>  | WT               | 0.522  | 0.337 | No  |
|              | <i>ssaK::cat</i> | 0.228  | 0.082 |     |
| <i>sseJ</i>  | WT               | 0.632  | 0.105 | No  |
|              | <i>ssaK::cat</i> | 0.220  | 0.056 |     |
| <i>sseK2</i> | WT               | 1.129  | 0.131 | No  |
|              | <i>ssaK::cat</i> | 0.582  | 0.082 |     |
| <i>sseK3</i> | WT               | 1.307  | 0.552 | No  |
|              | <i>ssaK::cat</i> | 0.882  | 0.222 |     |
| <i>sseL</i>  | WT               | 45.097 | 4.337 | Yes |
|              | <i>ssaK::cat</i> | 0.562  | 0.039 |     |
| <i>sseH2</i> | WT               | 1.681  | 0.087 | No  |
|              | <i>ssaK::cat</i> | 0.778  | 0.040 |     |
| <i>steC</i>  | WT               | 3.103  | 1.585 | No  |
|              | <i>ssaK::cat</i> | 2.202  | 0.106 |     |
| <i>steD</i>  | WT               | 23.119 | 0.610 | Yes |
|              | <i>ssaK::cat</i> | 1.023  | 0.310 |     |

**Supplemental Table 4. Description of *Salmonella* effector proteins relevant to this work.**

| Effector       | T3S Utilized | Genetic Islands | Homologues                                                                                                                                                                                                       | Activity                                       | Host cell target(s) | Infection Phenotypes                                                                                                                     | Refs.    |
|----------------|--------------|-----------------|------------------------------------------------------------------------------------------------------------------------------------------------------------------------------------------------------------------|------------------------------------------------|---------------------|------------------------------------------------------------------------------------------------------------------------------------------|----------|
| GtgA (STM1026) | SPI-2        | Gifsy-2         | <i>S. Typhimurium</i> :<br>GogA (STM2614)<br>PipA (STM1087)                                                                                                                                                      |                                                |                     | Required for full virulence                                                                                                              | (5, 6)   |
| CigR (STM3762) | SPI-2        | SPI-3           |                                                                                                                                                                                                                  |                                                |                     | Required for full virulence                                                                                                              | (6, 7)   |
| GogB (STM2584) | SPI-2        | Gifsy-1         | N-terminus:<br><i>Yersinia</i> YopM,<br><i>Shigella</i> IpaH <sub>7,8/9,8</sub><br><i>Salmonella</i> SspH1/2, SlrP<br><br>C-terminus:<br><i>Yersinia</i> YP2634/Y1471<br>rabbit EPEC OrfL,<br>EHEC 0157:H7 Z1829 |                                                |                     |                                                                                                                                          | (8, 9)   |
| SseL (STM2287) | SPI-2        |                 |                                                                                                                                                                                                                  | Cysteine protease with deubiquitinase activity | IκBα                | Impairs IκBα ubiquitination and degradation but not phosphorylation, inhibits macrophage apoptosis, downregulates inflammatory responses | (10, 11) |
| SteD (STM2139) | SPI-2        |                 |                                                                                                                                                                                                                  |                                                |                     | Required for full virulence                                                                                                              | (6)      |

Supplemental Table 5. LC-MS/MS Identification of CyaA' peptides.

| UTR         | CyaA' Peptide Identified    | MS-GF Spectral Probability | PPM Mass Error | P Value  | Peptide False Discovery Rate |
|-------------|-----------------------------|----------------------------|----------------|----------|------------------------------|
| <i>gtgA</i> | SSDWGLQAGYIPVNPNSLK         | 3.66E-18                   | -0.298         | 1.09E-11 | 0                            |
|             | SSDWGLQAGYIPVNPNSLK         | 5.47E-18                   | -0.478         | 1.62E-11 | 0                            |
|             | VIGNAAGIPLTADIDMFAIMPHLSNFR | 1.51E-11                   | -1.185         | 4.5E-05  | 0                            |
|             | VIGNAAGIPLTADIDMFAIMPHLSNFR | 6.45E-10                   | -1.101         | 1.92E-03 | 0                            |
|             | VIGNAAGIPLTADIDMFAIMPHLSNFR | 7.42E-10                   | -1.439         | 2.20E-03 | 0.0011                       |
|             | LVNPHSTSLIAEGVATK           | 2.55E-13                   | -2.602         | 7.56E-07 | 0                            |
|             | LVNPHSTSLIAEGVATK           | 5.95E-13                   | -1.125         | 1.77E-06 | 0                            |
|             | QAGLVTMADGVVASNHAGYEQFEFR   | 2.04E-22                   | -0.709         | 6.07E-16 | 0                            |
|             | RAASEATGGLDR                | 7.16E-12                   | -1.929         | 2.12E-05 | 0                            |
|             | SSVTSGDSVTDYLAR             | 1.64E-19                   | -1.411         | 4.88E-13 | 0                            |
|             | SSVTSGDSVTDYLAR             | 9.35E-19                   | -1.490         | 2.77E-12 | 0                            |
|             | SSVTSGDSVTDYLAR             | 9.66E-12                   | -2.352         | 2.87E-05 | 0                            |
| <i>cigR</i> | VIGNAAGIPLTADIDMFAIMPHLSNFR | 8.82E-12                   | -1.863         | 2.62E-05 | 0                            |
| <i>gogB</i> | VIGNAAGIPLTADIDMFAIMPHLSNFR | 5.58E-13                   | -0.254         | 1.66E-06 | 0                            |
|             | VIGNAAGIPLTADIDMFAIMPHLSNFR | 3.82E-12                   | -0.593         | 1.14E-05 | 0                            |
|             | LVNPHSTSLIAEGVATK           | 1.27E-13                   | -0.352         | 3.77E-07 | 0                            |
|             | LVNPHSTSLIAEGVATK           | 1.15E-10                   | -0.633         | 3.40E-04 | 0                            |
|             | RAASEATGGLDR                | 7.91E-13                   | 1.015          | 2.34E-06 | 0                            |
|             | SSVTSGDSVTDYLAR             | 1.44E-15                   | 0.000          | 4.28E-09 | 0                            |
| <i>sseL</i> | VIGNAAGIPLTADIDMFAIMPHLSNFR | 9.54E-11                   | -0.931         | 2.84E-04 | 0                            |
|             | VIGNAAGIPLTADIDMFAIMPHLSNFR | 1.30E-10                   | 0.423          | 3.85E-04 | 0                            |
|             | LVNPHSTSLIAEGVATK           | 1.25E-13                   | -1.195         | 3.70E-07 | 0                            |
| <i>steD</i> | SSDWGLQAGYIPVNPNSLK         | 1.12E-16                   | 1.134          | 3.30E-10 | 0                            |
|             | VIGNAAGIPLTADIDMFAIMPHLSNFR | 3.66E-11                   | -0.593         | 1.09E-04 | 0                            |
|             | VIGNAAGIPLTADIDMFAIMPHLSNFR | 1.08E-10                   | 0.169          | 3.20E-04 | 0.0003                       |
|             | LVNPHSTSLIAEGVATK           | 1.31E-11                   | -0.774         | 3.88E-05 | 0                            |
|             | SSVTSGDSVTDYLAR             | 1.85E-10                   | -1.960         | 5.48E-04 | 0                            |
|             | SSVTSGDSVTDYLAR             | 7.30E-09                   | -2.431         | 2.14E-02 | 0.0149                       |

**Supplemental Table 6. LC-MS/MS Identification of RNA binding proteins.**

| 14028 Locus | LT2 Locus | Gene         | Mass (kDa) | Protein Description                                  | Unique Peptides | Total Spectral Counts | <i>gtgA</i> RNA | <i>spvD</i> RNA |
|-------------|-----------|--------------|------------|------------------------------------------------------|-----------------|-----------------------|-----------------|-----------------|
| STM14_5242  | STM4361   | <i>hfq</i>   | 11.13      | RNA-binding protein Hfq                              | 3               | 4                     | 4               |                 |
| STM14_4121  | STM3418   | <i>rpsM</i>  | 13.16      | 30S ribosomal protein S13                            | 2               | 4                     | 2               | 2               |
| STM14_4128  | STM3425   | <i>rplF</i>  | 18.86      | 50S ribosomal protein L6                             | 2               | 2                     | 2               |                 |
| STM14_4142  | STM3439   | <i>rplD</i>  | 22.09      | 50S ribosomal protein L4                             | 3               | 3                     | 3               |                 |
| STM14_4143  | STM3440   | <i>rplC</i>  | 22.25      | 50S ribosomal protein L3                             | 2               | 6                     | 6               |                 |
| STM14_4119  | STM3416   | <i>rpsD</i>  | 23.49      | 30S ribosomal protein S4                             | 4               | 7                     | 7               |                 |
| STM14_4987  | STM4150   | <i>rplA</i>  | 24.73      | 50S ribosomal protein L1                             | 3               | 5                     | 5               |                 |
| STM14_4137  | STM3434   | <i>rpsC</i>  | 25.98      | 30S ribosomal protein S3                             | 2               | 2                     | 2               |                 |
| STM14_0257  | STM0216   | <i>rpsB</i>  | 26.76      | 30S ribosomal protein S2                             | 2               | 2                     | 2               |                 |
| STM14_4052  | STM3359   | <i>mdh</i>   | 32.48      | malate dehydrogenase                                 | 2               | 3                     | 2               | 1               |
| STM14_2153  | STM1780   | <i>prsA</i>  | 34.22      | ribose-phosphate pyrophosphokinase                   | 4               | 5                     | 4               | 1               |
| STM14_4118  | STM3415   | <i>rpoA</i>  | 36.51      | DNA-directed RNA polymerase $\alpha$                 | 5               | 12                    | 6               | 6               |
| STM14_3531  | STM2928   | <i>truD</i>  | 39.33      | tRNA pseudouridine synthase D                        | 2               | 2                     | 2               |                 |
| STM14_4149  | STM4146   | <i>tuf</i>   | 43.28      | elongation factor Tu                                 | 6               | 14                    | 9               | 5               |
| STM14_0856  | STM0737   | <i>sucB</i>  | 43.86      | dihydrolipoamide acetyltransferase                   | 2               | 2                     | 2               |                 |
| STM14_3557  | STM2952   | <i>eno</i>   | 45.6       | phosphopyruvate hydratase                            | 3               | 3                     |                 | 3               |
| STM14_0185  | STM0154   | <i>lpdA</i>  | 50.64      | dihydrolipoamide dehydrogenase                       | 2               | 2                     |                 | 2               |
| STM14_4663  | STM3867   | <i>atpA</i>  | 55.11      | F0F1 ATP synthase subunit alpha                      | 3               | 6                     | 1               | 5               |
| STM14_5207  | STM4330   | <i>groEL</i> | 57.29      | chaperonin GroEL                                     | 11              | 17                    | 1               | 16              |
| STM14_1110  | STM0981   | <i>rpsA</i>  | 61.17      | 30S ribosomal protein S1                             | 3               | 5                     | 1               | 4               |
| STM14_4440  | STM3682   | <i>selB</i>  | 68.65      | selenocysteinyl-tRNA translation factor              | 4               | 5                     |                 | 5               |
| STM14_0190  | STM0158   | <i>acnB</i>  | 93.53      | aconitate hydratase 2/2-methylisocitrate dehydratase | 3               | 11                    | 4               | 7               |



## Supplemental References

1. **Kim, S., N. Mischerikow, N. Bandeira, J. D. Navarro, L. Wich, S. Mohammed, A. J. R. Heck, and P. A. Pevzner.** 2010. The generating function of CID, ETD, and CID/ETD pairs of tandem mass spectra: applications to database search. *Molecular & Cellular Proteomics* **9**:2840-2852.
2. **Geddes, K., M. Worley, G. Niemann, and F. Heffron.** 2005. Identification of new secreted effectors in *Salmonella enterica* serovar Typhimurium. *Infect Immun* **73**:6260-6271.
3. **Ansong, C., H. Yoon, S. Porwollik, H. Mottaz-Brewer, B. O. Petritis, N. Jaitly, J. N. Adkins, M. McClelland, F. Heffron, and R. D. Smith.** 2009. Global systems-level analysis of Hfq and SmpB deletion mutants in *Salmonella*: implications for virulence and global protein translation. *PLoS One* **4**:e4809.
4. **Vogel, J., and B. F. Luisi.** 2011. Hfq and its constellation of RNA. *Nat Rev Microbiol* **9**:578-589.
5. **Smith, J. N., and B. M. Ahmer.** 2003. Detection of other microbial species by *Salmonella*: expression of the SdiA regulon. *J Bacteriol* **185**:1357-1366.
6. **Niemann, G. S., R. N. Brown, J. K. Gustin, A. Stufkens, A. S. Shaikh-Kidwai, J. Li, J. E. McDermott, H. M. Brewer, A. Schepmoes, R. D. Smith, J. N. Adkins, and F. Heffron.** 2011. Discovery of novel secreted virulence factors from *Salmonella enterica* serovar Typhimurium by proteomic analysis of culture supernatants. *Infect Immun* **79**:33-43.
7. **Blanc-Potard, A. B., F. Solomon, J. Kayser, and E. A. Groisman.** 1999. The SPI-3 pathogenicity island of *Salmonella enterica*. *J Bacteriol* **181**:998-1004.

8. **Coombes, B. K., M. E. Wickham, N. F. Brown, S. Lemire, L. Bossi, W. W. Hsiao, F. S. Brinkman, and B. B. Finlay.** 2005. Genetic and molecular analysis of GogB, a phage-encoded type III-secreted substrate in *Salmonella enterica* serovar typhimurium with autonomous expression from its associated phage. *J Mol Biol* **348**:817-830.
9. **Ramsden, A. E., D. W. Holden, and L. J. Mota.** 2007. Membrane dynamics and spatial distribution of *Salmonella*-containing vacuoles. *Trends Microbiol* **15**:516-524.
10. **Le Negrate, G., B. Faustin, K. Welsh, M. Loeffler, M. Krajewska, P. Hasegawa, S. Mukherjee, K. Orth, S. Krajewski, A. Godzik, D. G. Guiney, and J. C. Reed.** 2008. *Salmonella* secreted factor L deubiquitinase of *Salmonella typhimurium* inhibits NF- $\kappa$ B, suppresses I $\kappa$ B $\alpha$  ubiquitination and modulates innate immune responses. *J Immunol* **180**:5045-5056.
11. **Rytönen, A., J. Poh, J. Garmendia, C. Boyle, A. Thompson, M. Liu, P. Freemont, J. C. Hinton, and D. W. Holden.** 2007. SseL, a *Salmonella* deubiquitinase required for macrophage killing and virulence. *Proc Natl Acad Sci U S A* **104**:3502-3507.
